# Supplementary material for: CircRNA circ_0124554 blocked the ubiquitination of AKT promoting the skip lymphovascular invasion on hepatic metastasis in colorectal cancer
Source: PubMed Central journal article supplement (PMC7960696; doi:10.1038/s41419-021-03565-3), 2021-03-15

## **Supplementary Information**

**Supplementary Table 1.** The clinicopathological characteristics of patients with CRC.

**Supplementary Table 2.** Correlation of hsa\_circ\_0124554 expression and clinicopathological characteristics of patients with CRC.

**Supplementary Table 3.** Primers for Quantitative RT-PCR

**Supplementary Table 4.** Summary of shRNA Oligos

**Supplementary Table 5.** Summary of antibodies

**Supplementary Figure 1. Hsa\_circ\_0124554 plays roles in CRC cell lines, but not its linear form.** a: qRT-PCR analysis of circFOXP1 and FOXP1 mRNA after treatment with Actinomycin D at the indicated time points in HT29, Caco2 and HCT116 cells. b: Sanger sequencing was applied to determine back-splicing site of circFOXP1. c: The knockdown efficiency of shRNAs for circFOXP1 in HT29 and Caco2 cells. d: The overexpression efficiency of Lv-circRNA for circFOXP1 in HCT116 cell.

**Supplementary Figure 2. The linear form control of the RNA was utilized in transwell assay and wound healing assay.**

**Supplementary Figure 3.** Hsa\_circ\_0124554 could not affect the proliferation, apoptosis or cycle of CRC cells. a: The proliferation of CRC cells was measured by CCK8. b: The cell cycle of CRC cells was detected by flow cytometry. c: The apoptosis of CRC cells was detected by flow cytometry. Data are presented as means  $\pm$  SD (n.s. indicated no significant).

**Supplementary Figure 4. Protein expression of AKT in cells with hsa\_circ\_0124554 overexpression or suppression.** a-b: Representative blot of western blot. c: Statistical analysis of band. Data are presented as means  $\pm$  SD. \*P < 0.05, \*\*P < 0.01, \*\*\*P < 0.001.

**Supplementary Figure 5. The detailed binding site of hsa\_circ\_0124554 with AKT.**

a: The detailed bind region in hsa\_circ\_0124554 and AKT. b: The interaction matrix of binding ability.

**Supplementary Figure 6. The phosphorylation of AKT were detected with IGF1**

**stimulation.** a: Representative blot of western blot. b: Representative blot of western blot. Data are presented as means  $\pm$  SD. \*P < 0.05, \*\*P < 0.01, \*\*\*P < 0.001.

**Supplementary Figure 7. Ubiquitination of AKT in CRC cells treated with different groups in the presence of IGF1.** a: Representative blot of western blot. b: Statistical analysis of band. Data are presented as means  $\pm$  SD. \*\*\*P < 0.01.

**Supplementary Figure 8. Correlation between AKT/pAKT and hsa\_circ\_0124554.** a: Relative expression of hsa\_circ\_0124554 and AKT in cell lines. b: Relative protein expression of AKT and pAKT in cell lines. c: Pearson correlation analysis between AKT and hsa\_circ\_0124554 and pAKT and hsa\_circ\_0124554.

**Supplementary Table S1. The clinicopathological characteristics of patients with CRC.**

|                               |          | <b>LNLM1</b> | <b>LNLM0</b> | <i>p</i> value <sup>a</sup> |
|-------------------------------|----------|--------------|--------------|-----------------------------|
|                               | <b>n</b> | <b>n=40</b>  | <b>n=40</b>  |                             |
| <b>Age(years)</b>             |          |              |              |                             |
| <60                           | 32       | 18           | 14           | 0.361                       |
| ≥60                           | 48       | 22           | 26           |                             |
| <b>Gender</b>                 |          |              |              |                             |
| Male                          | 50       | 24           | 26           | 0.644                       |
| Female                        | 30       | 16           | 14           |                             |
| <b>Tumor diameter (cm)</b>    |          |              |              |                             |
| <5cm                          | 21       | 12           | 9            | 0.446                       |
| ≥5cm                          | 59       | 28           | 31           |                             |
| <b>Pathologic type</b>        |          |              |              |                             |
| ADC                           | 75       | 37           | 38           | 0.644                       |
| MADC                          | 5        | 3            | 2            |                             |
| <b>Vascular invasion</b>      |          |              |              |                             |
| No                            | 21       | 15           | 6            | <b>0.022</b>                |
| Yes                           | 59       | 25           | 34           |                             |
| <b>T stage</b>                |          |              |              |                             |
| T1                            | 10       | 4            | 6            | 0.575                       |
| T2                            | 26       | 15           | 11           |                             |
| T3                            | 44       | 21           | 23           |                             |
| <b>Differentiation degree</b> |          |              |              |                             |
| Highly                        | 10       | 4            | 6            | 0.546                       |
| Moderately                    | 58       | 23           | 25           |                             |
| Poorly                        | 12       | 13           | 9            |                             |
| <b>Primary tumor site</b>     |          |              |              |                             |
| Colon                         | 39       | 21           | 18           | 0.502                       |
| Rectum                        | 41       | 19           | 22           |                             |

LNLM1: Lymph node negative with liver metastasis; LNLM0: Lymph node negative without liver metastasis; a: Chi-square test, ADC: Adenocarcinoma; MADC: Mucinous adenocarcinoma

**Supplementary Table S2. Correlation of hsa\_circ\_0124554 expression and clinicopathological characteristics of patients with CRC.**

|                               | hsa_circ_0124554 expression <sup>a</sup> |                     |                      | <i>p</i> value <sup>b</sup> |
|-------------------------------|------------------------------------------|---------------------|----------------------|-----------------------------|
|                               | <b>n</b>                                 | <b>Low<br/>n=40</b> | <b>High<br/>n=40</b> |                             |
| <b>Tumor diameter (cm)</b>    |                                          |                     |                      |                             |
| <5cm                          | 21                                       | 11                  | 10                   | 0.799                       |
| ≥5cm                          | 59                                       | 29                  | 30                   |                             |
| <b>Pathologic type</b>        |                                          |                     |                      |                             |
| ADC                           | 75                                       | 38                  | 37                   | 0.644                       |
| MADC                          | 5                                        | 2                   | 3                    |                             |
| <b>Vascular invasion</b>      |                                          |                     |                      |                             |
| No                            | 21                                       | 16                  | 5                    | <b>0.005</b>                |
| Yes                           | 59                                       | 24                  | 35                   |                             |
| <b>T stage</b>                |                                          |                     |                      |                             |
| T1                            | 10                                       | 5                   | 5                    | 0.885                       |
| T2                            | 26                                       | 12                  | 14                   |                             |
| T3                            | 44                                       | 23                  | 21                   |                             |
| <b>Differentiation degree</b> |                                          |                     |                      |                             |
| Highly                        | 10                                       | 5                   | 5                    | 0.818                       |
| Moderately                    | 58                                       | 28                  | 30                   |                             |
| Poorly                        | 12                                       | 7                   | 5                    |                             |
| <b>Liver metastasis</b>       |                                          |                     |                      |                             |
| Negative                      | 40                                       | 28                  | 12                   | <b>0.0003</b>               |
| Positive                      | 40                                       | 12                  | 28                   |                             |
| <b>Primary tumor site</b>     |                                          |                     |                      |                             |
| Colon                         | 39                                       | 19                  | 20                   | 0.823                       |
| Rectum                        | 41                                       | 21                  | 20                   |                             |

a: Medium as cutoff, b: Chi-square test, ADC: Adenocarcinoma; MADC: Mucinous adenocarcinoma

**Supplementary Table S3. Primers for Quantitative RT- PCR**

| <b>Gene name</b> | <b>All Patients</b> | <b>Sequence</b>         |
|------------------|---------------------|-------------------------|
| Circ_0124554     | Forward Primer      | TGCAGAAGAAACCACAGGCA    |
|                  | Reverse Primer      | CTTGGAAGGTGCAGAGGAGG    |
| Circ_0097743     | Forward Primer      | GGTTAAGGGGCAGATCCCAA    |
|                  | Reverse Primer      | GCGGCCAAGAAGCGATTTAG    |
| Circ_0079875     | Forward Primer      | TGGGTTCTGATGCCAGTCTT    |
|                  | Reverse Primer      | GGCCACGAAGACATGCTAGT    |
| Circ_0009582     | Forward Primer      | GAGTGGTGTTCATCCCGAGAG   |
|                  | Reverse Primer      | GGGAACTGGTTCATCATGCG    |
| EGFR             | Forward Primer      | GACGACAGGCCACCTCG       |
|                  | Reverse Primer      | CCCATTGGGACAGCTTGGAT    |
| GAPDH            | Forward Primer      | GGAGCGAGATCCCTCCAAAAT   |
|                  | Reverse Primer      | GGCTGTTGTCATACTTCTCATGG |

**Supplementary Table S4. Summary of shRNA Oligos**

---

| <b>Name</b>              | <b>Oligo Sequence</b>                                                                                            |
|--------------------------|------------------------------------------------------------------------------------------------------------------|
| hsa_circ_0124554 shRNA-1 | CACCGCCAAGGCCTTCTGACAATTCCGAAGAATT<br>GTCAGAAGGCCTTGGC<br>AAAAGCCAAGGCCTTCTGACAATTCTTCGGAATT<br>GTCAGAAGGCCTTGGC |
| hsa_circ_0124554 shRNA-2 | CACCACCTCTTGCTCAAGGCATGATCGAAATCAT<br>GCCTTGAGCAAGAGG<br>AAAACCTCTTGCTCAAGGCATGATTTTCGATCATG<br>CCTTGAGCAAGAGGT  |
| hsa_circ_0124554 shRNA-3 | CACCGCAGTTTGGATCTGACCACGACGAATCGTG<br>GTCAGATCCAAACTGC                                                           |

---

**Supplementary Table S5. Summary of antibodies**

| <b>Name</b>                       | <b>Catalog#</b> | <b>Company</b> | <b>Application</b> |
|-----------------------------------|-----------------|----------------|--------------------|
| Anti-AKT antibody                 | ab182729        | Abcam          | WB, IHC, IP        |
| Anti-AKT1 (phospho S473) antibody | ab81283         | Abcam          | WB                 |
| Phospho-Akt (Thr308) (D25E6) XP   | Cst13038        | CST            | WB                 |
| Anti-GAPDH antibody [6C5]         | ab8245          | Abcam          | WB                 |

WB: Western blot

IHC: immunohistochemistry

IP: immunoprecipitation

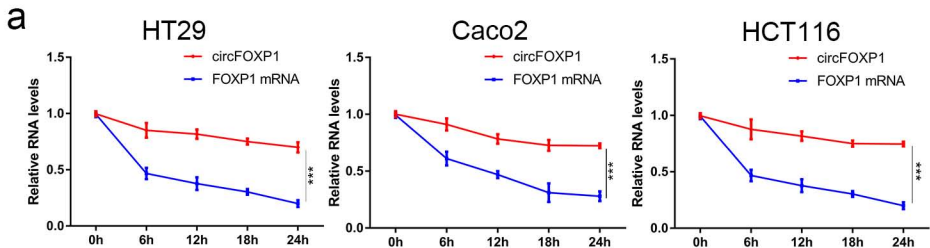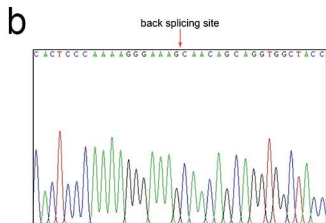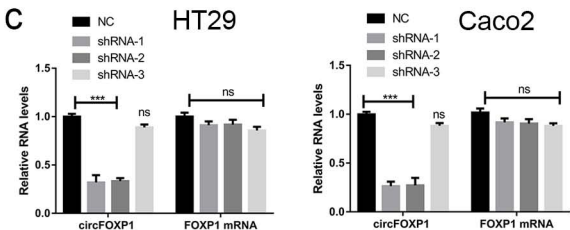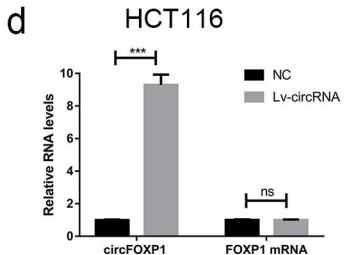



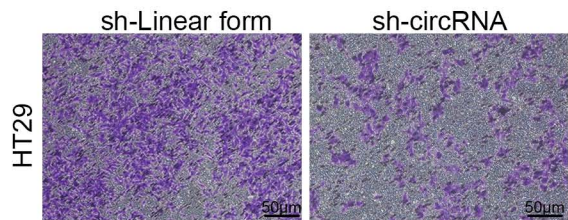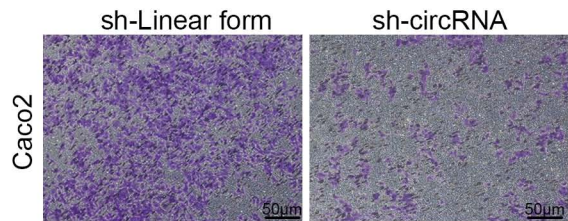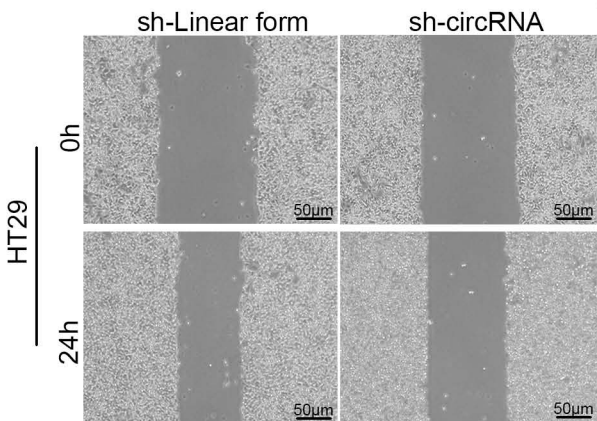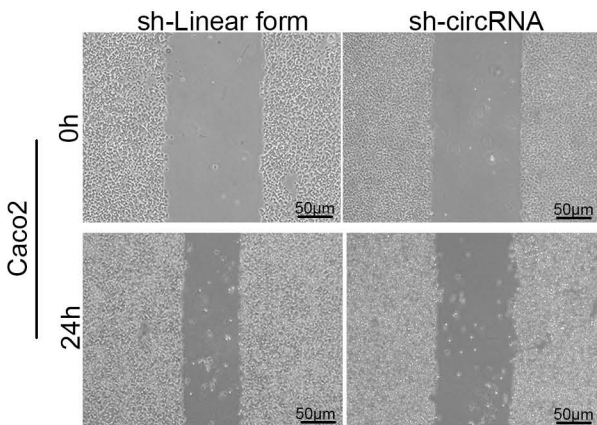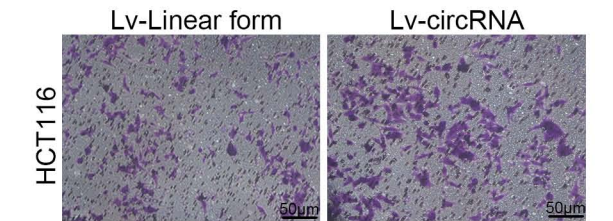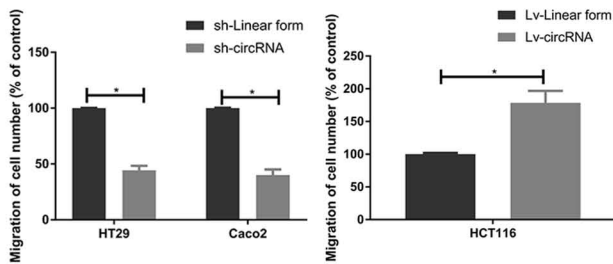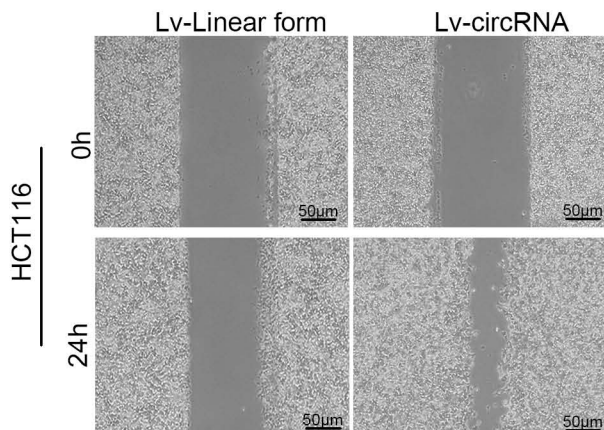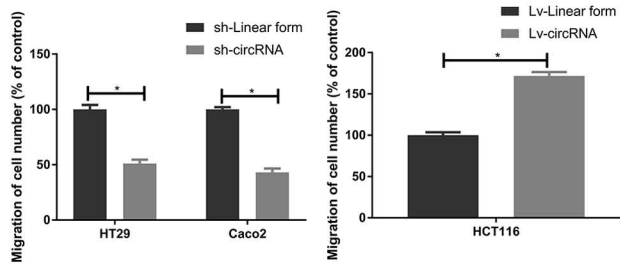

**a**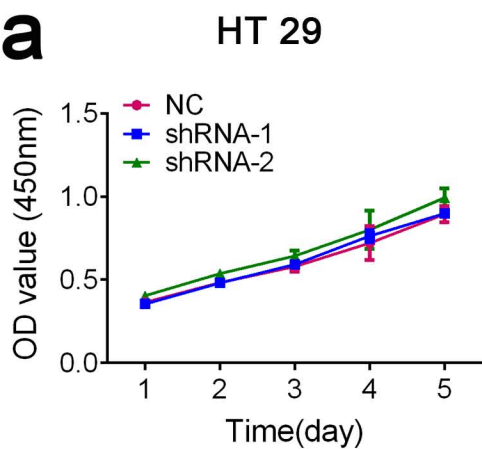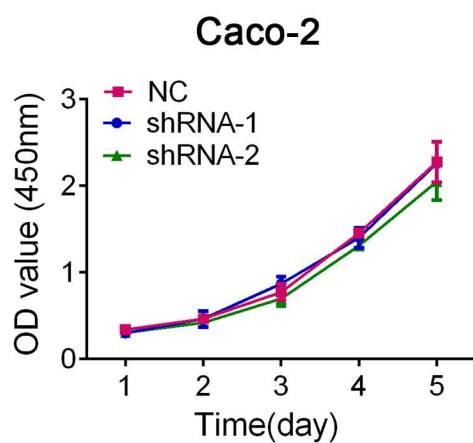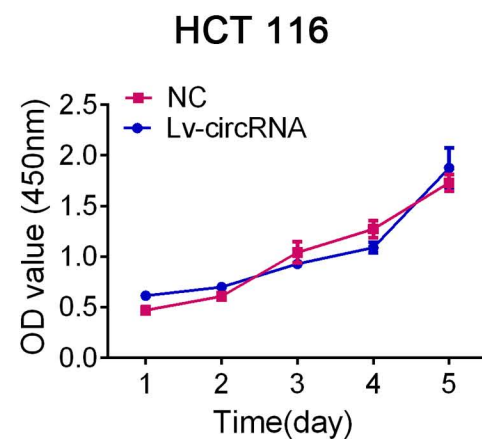**b**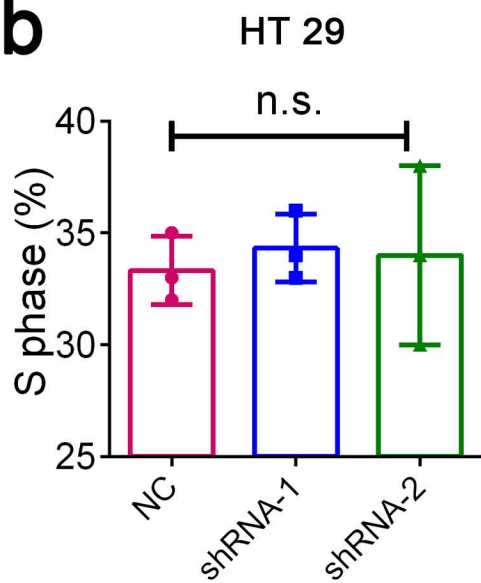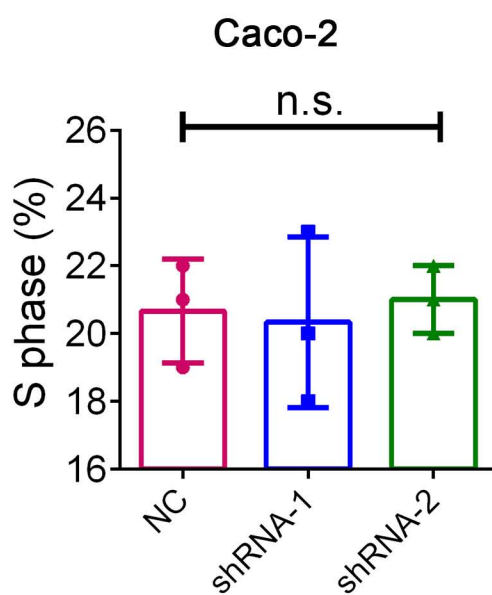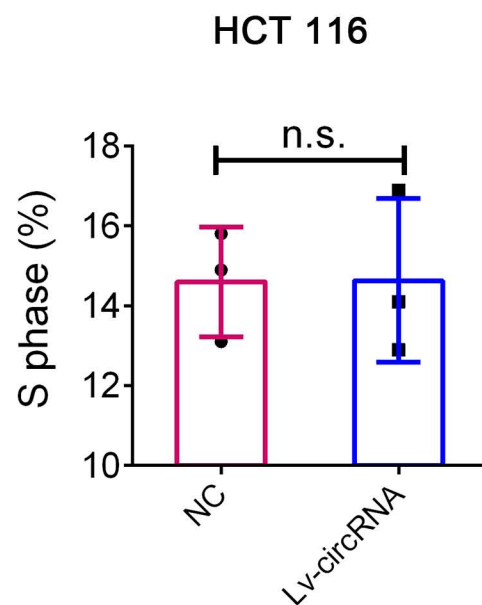**c**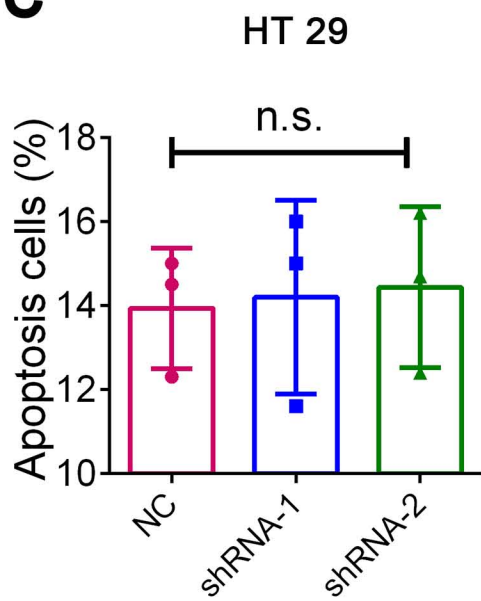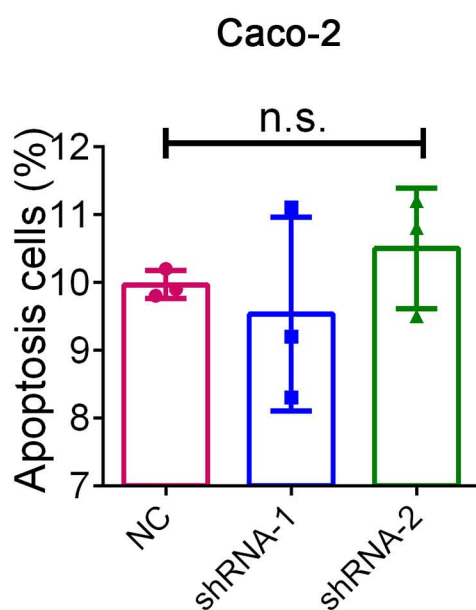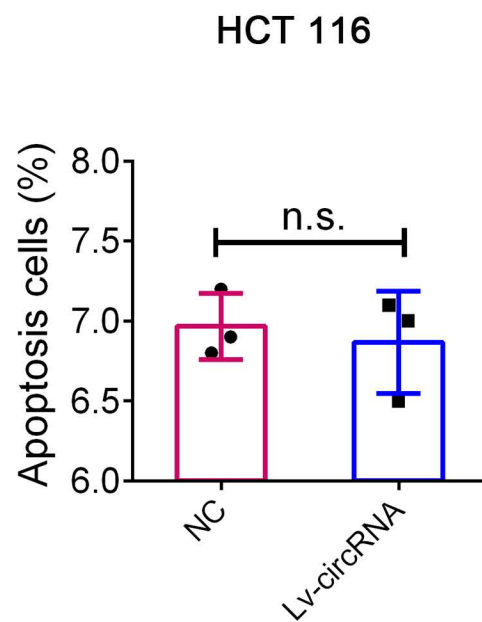

**a**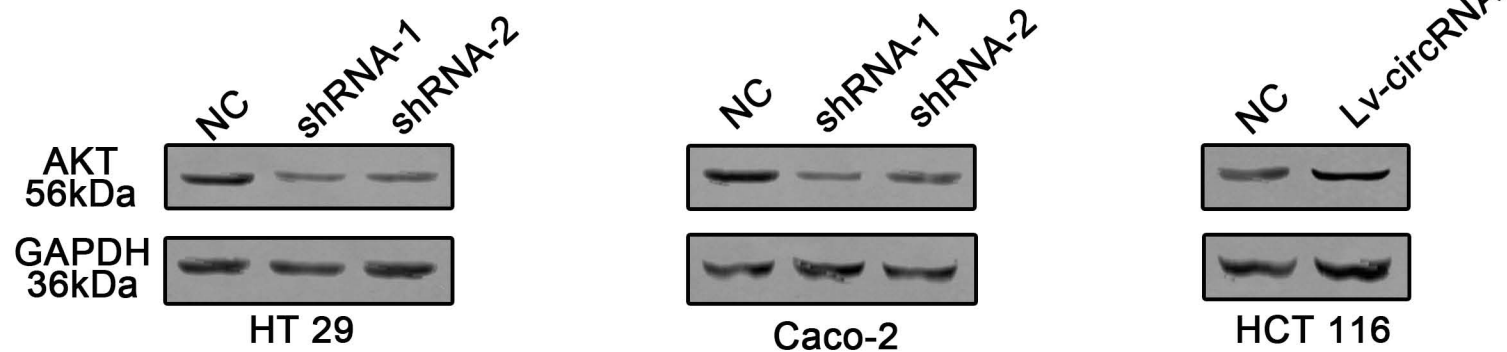**b**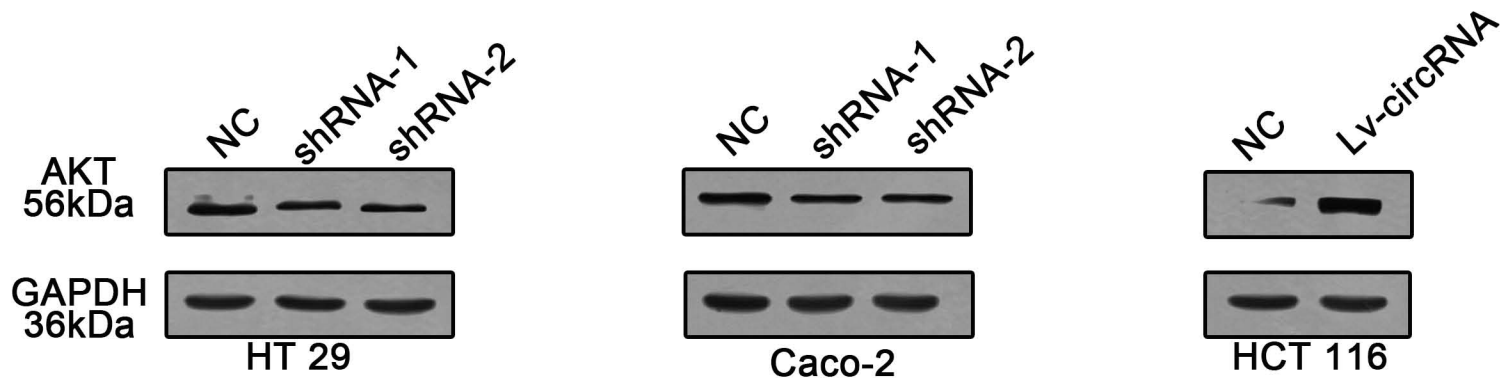**c**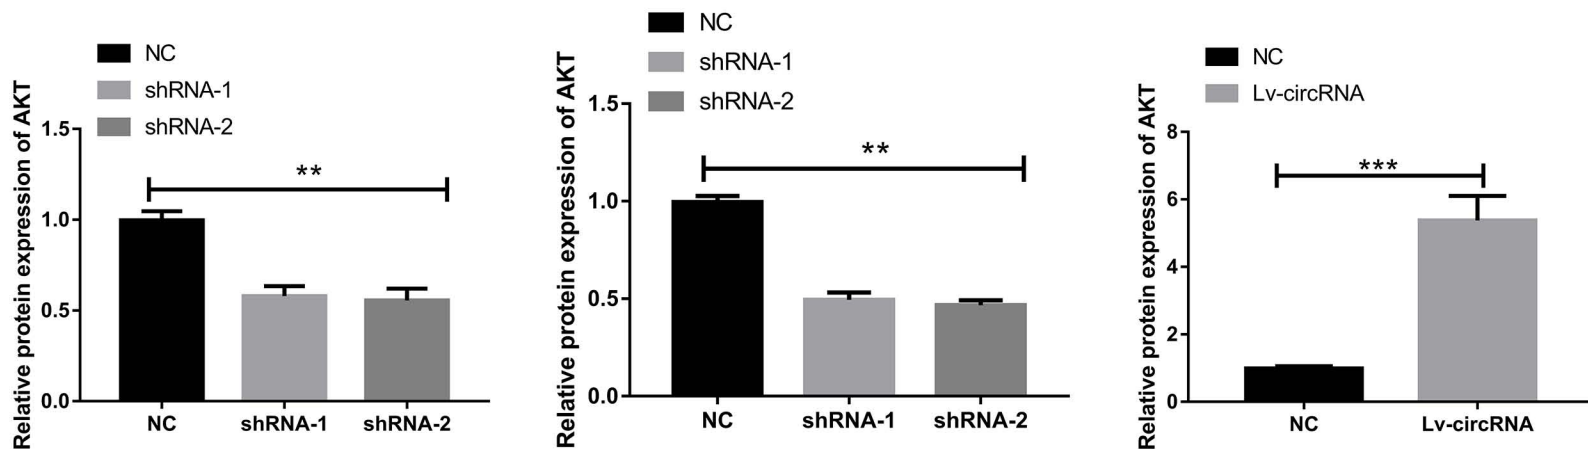

**a**

| #  | Protein region | RNA region | Interaction Propensity | Discriminative Power | Normalized Score |
|----|----------------|------------|------------------------|----------------------|------------------|
| 1  | 01-52          | 76-127     | 7.44                   | 24                   | 2.60             |
| 2  | 10-52          | 76-127     | 6.93                   | 22                   | 2.46             |
| 3  | 180-231        | 76-127     | 6.87                   | 22                   | 2.44             |
| 4  | 355-406        | 76-127     | 6.59                   | 22                   | 2.36             |
| 5  | 276-327        | 76-127     | 6.57                   | 22                   | 2.35             |
| 6  | 176-227        | 76-127     | 6.50                   | 22                   | 2.33             |
| 7  | 105-156        | 76-127     | 6.14                   | 22                   | 2.23             |
| 8  | 351-402        | 51-102     | 5.48                   | 22                   | 2.05             |
| 9  | 01-52          | 84-135     | 5.43                   | 22                   | 2.03             |
| 10 | 101-152        | 51-102     | 5.24                   | 22                   | 1.98             |
| 11 | 351-402        | 76-127     | 5.17                   | 22                   | 1.96             |
| 13 | 80-131         | 284-335    | 5.16                   | 22                   | 1.96             |
| 12 | 280-331        | 76-127     | 5.17                   | 22                   | 1.96             |
| 15 | 180-231        | 51-102     | 5.03                   | 22                   | 1.92             |
| 14 | 180-231        | 84-135     | 5.04                   | 22                   | 1.92             |
| 16 | 130-181        | 76-127     | 4.95                   | 20                   | 1.90             |
| 17 | 101-152        | 84-135     | 4.89                   | 20                   | 1.88             |
| 18 | 276-327        | 51-102     | 4.85                   | 20                   | 1.87             |
| 19 | 276-327        | 84-135     | 4.84                   | 20                   | 1.87             |
| 20 | 10-52          | 84-135     | 4.82                   | 20                   | 1.86             |

**b****Interaction Matrix**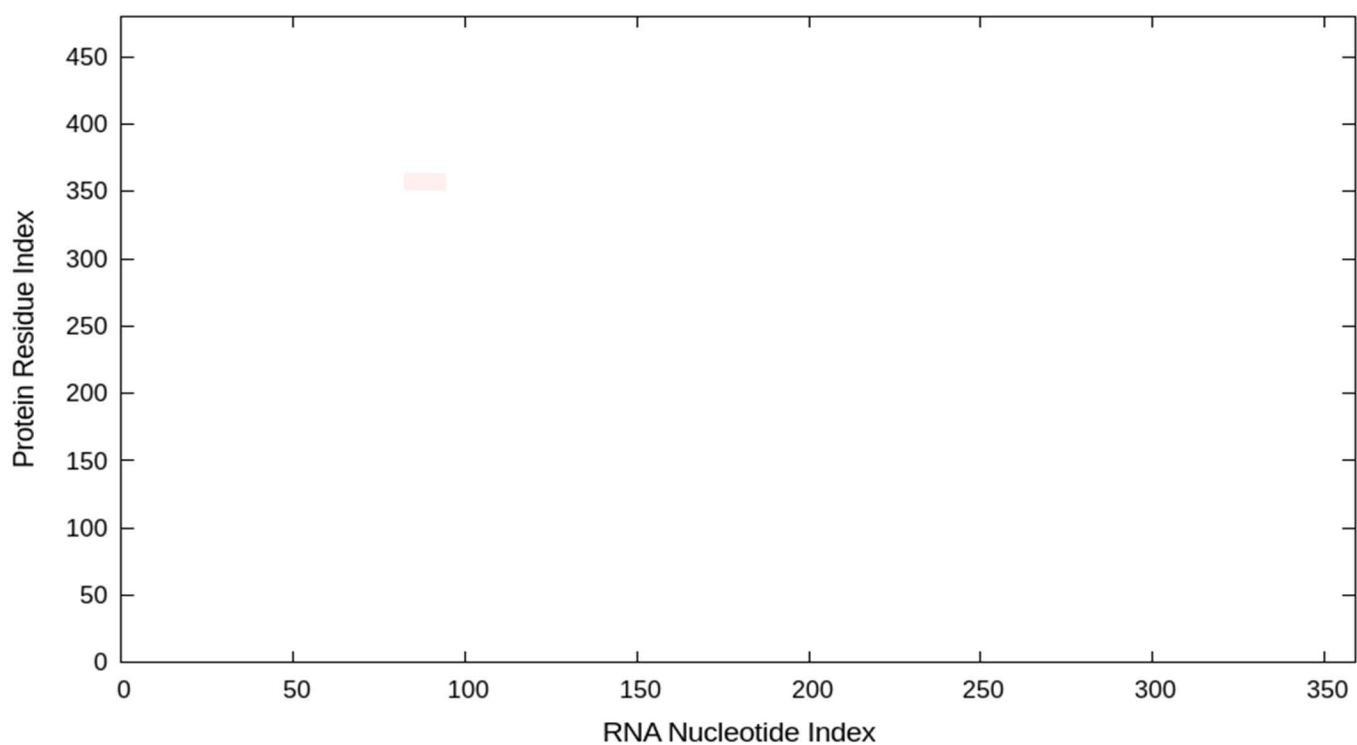

**a**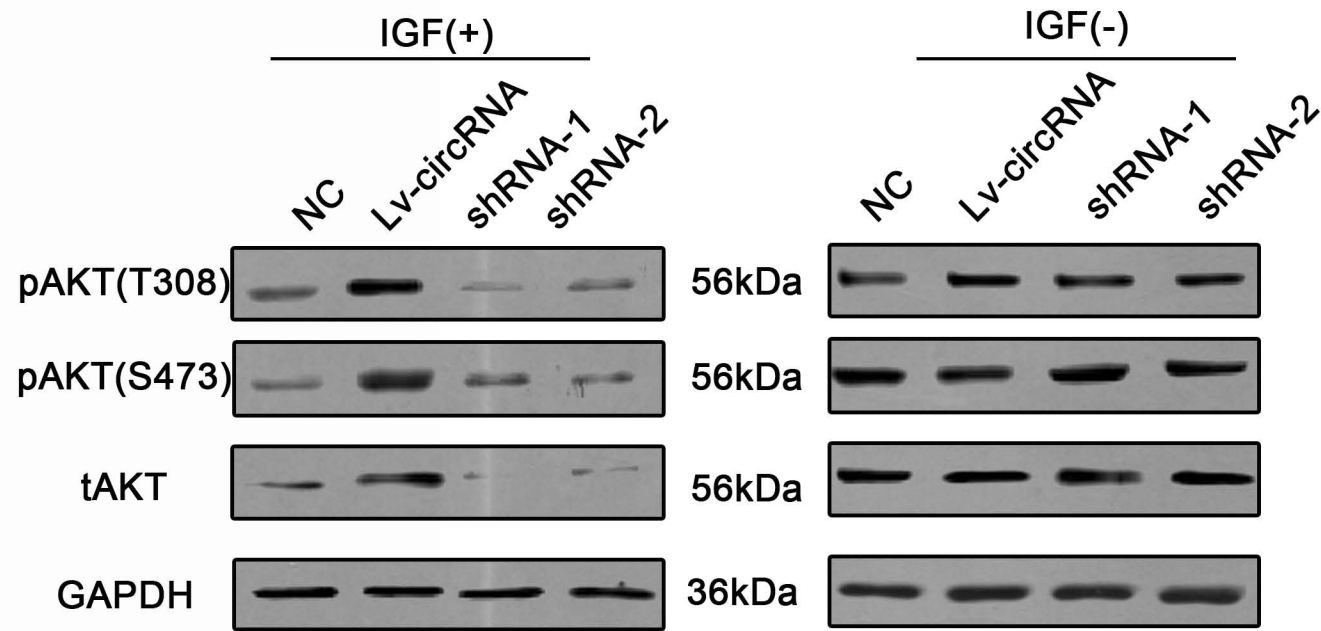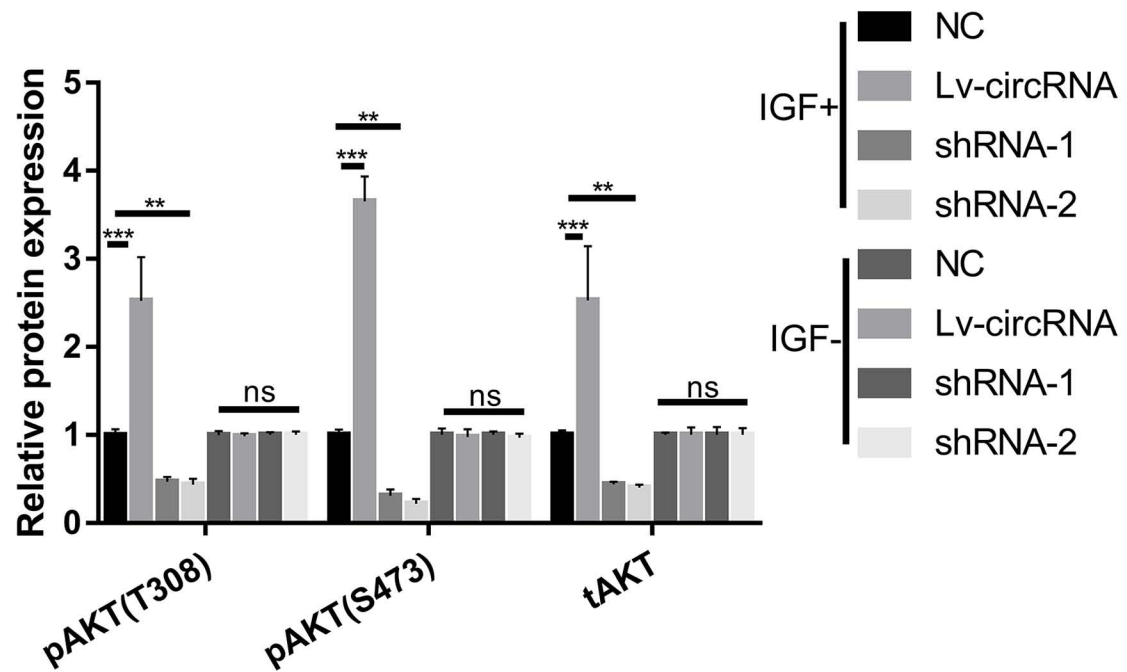**b**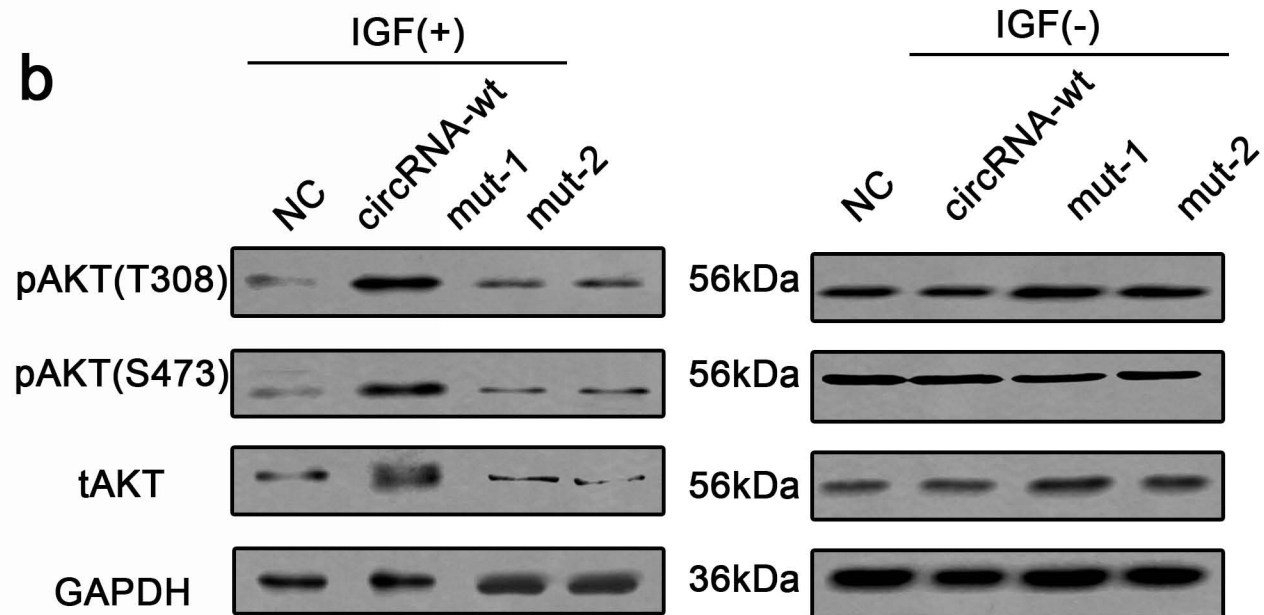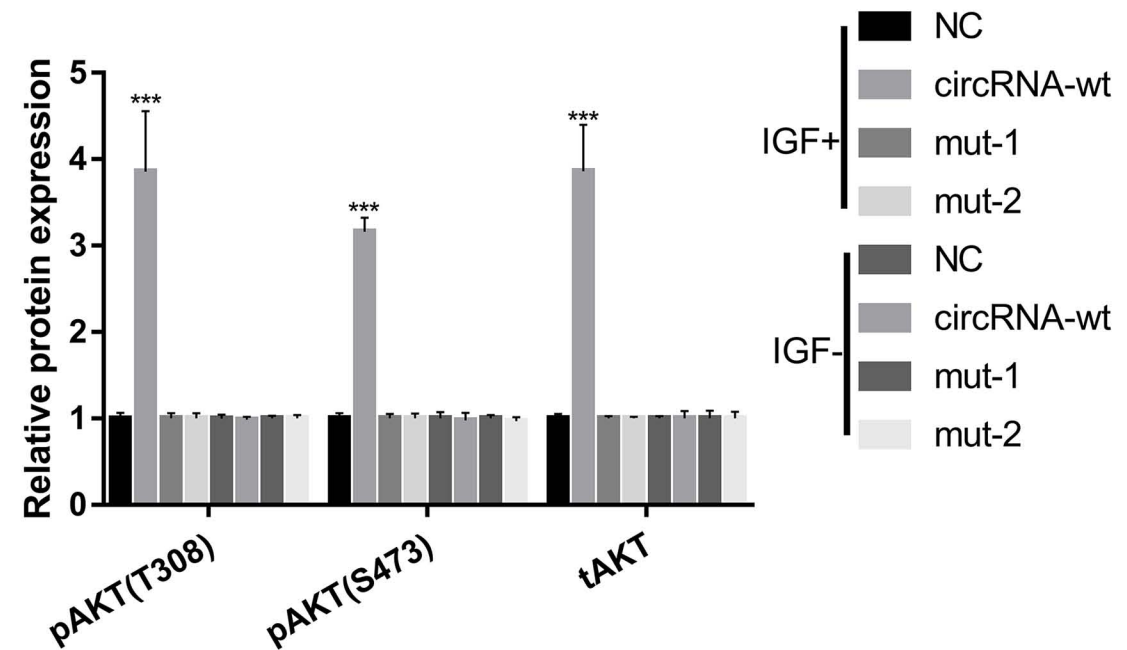

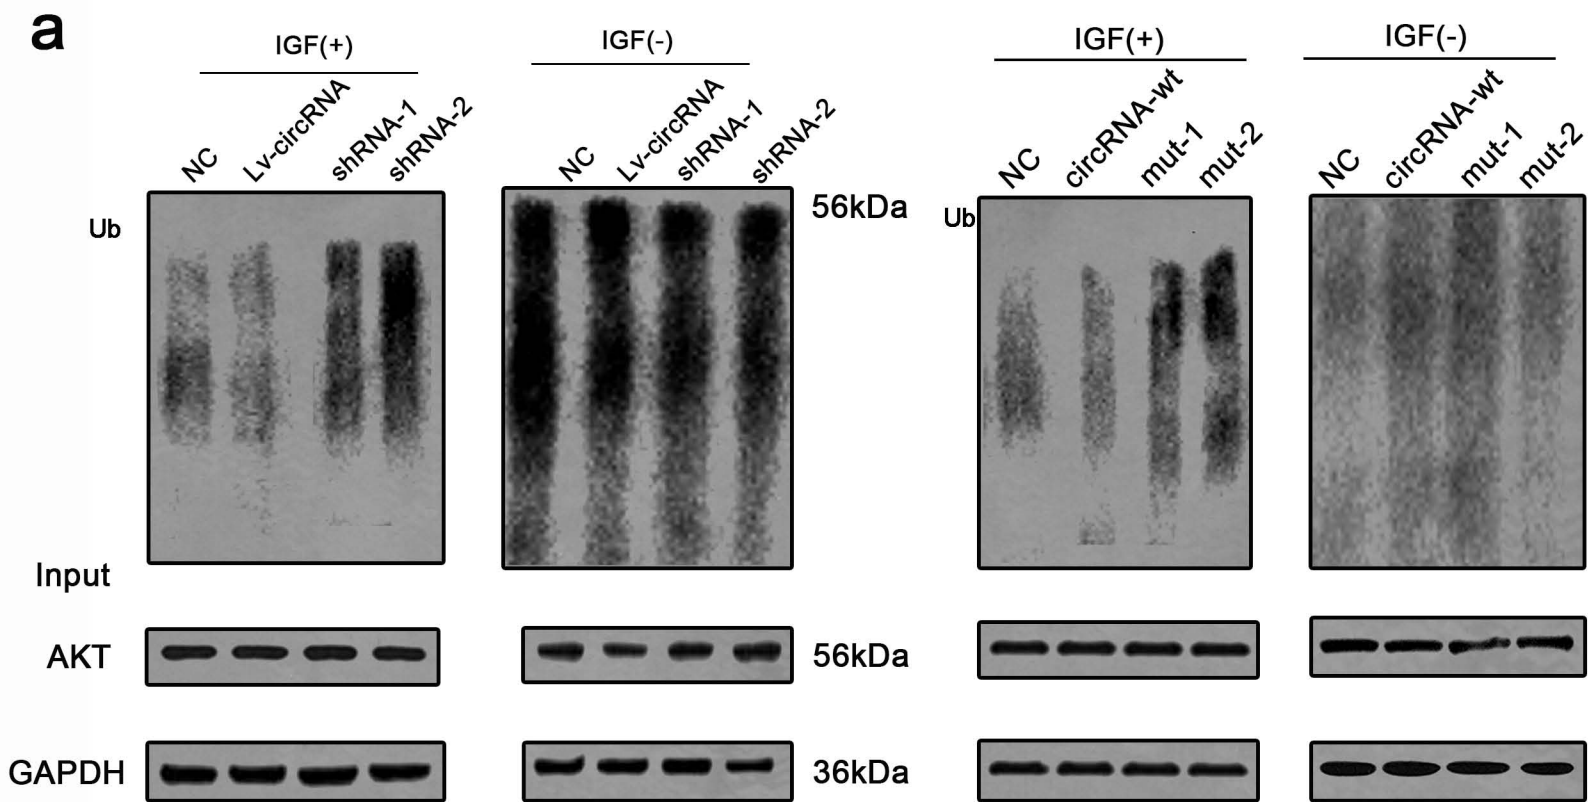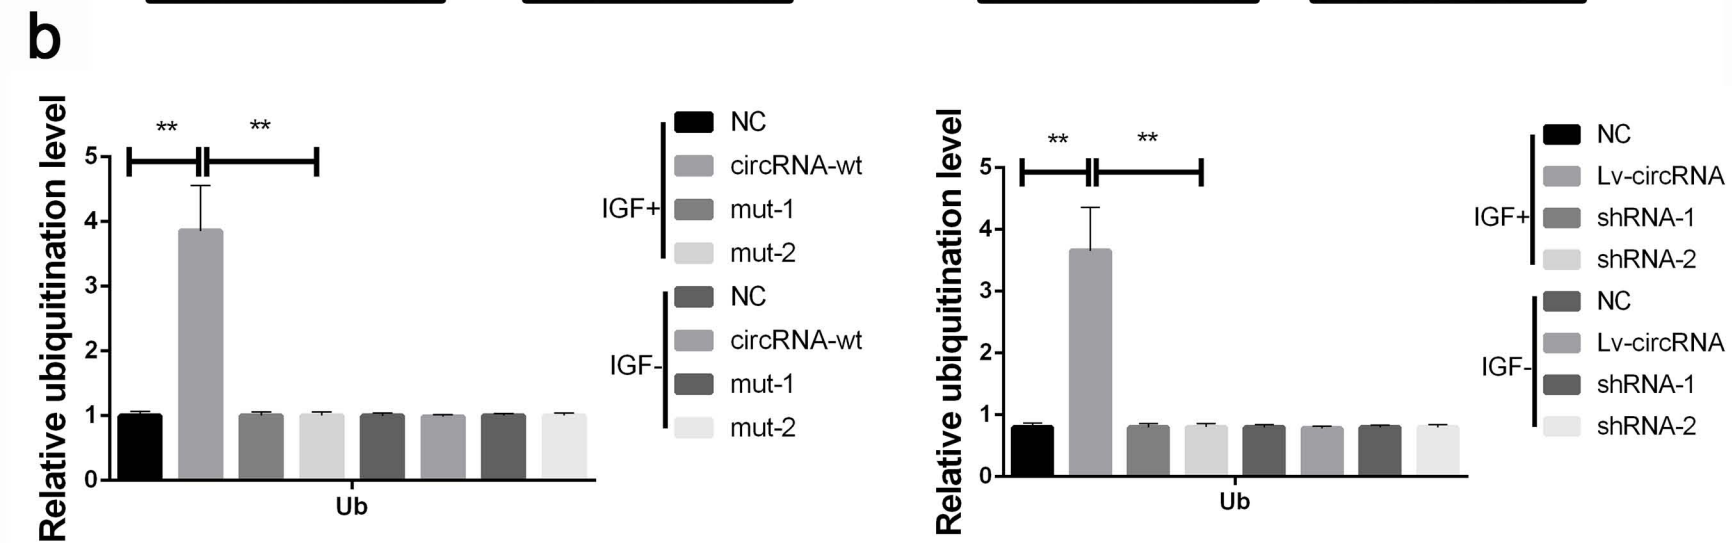

**a**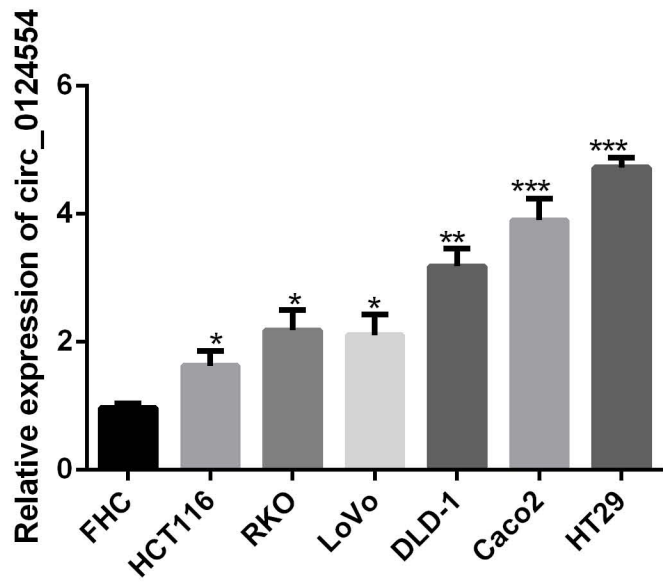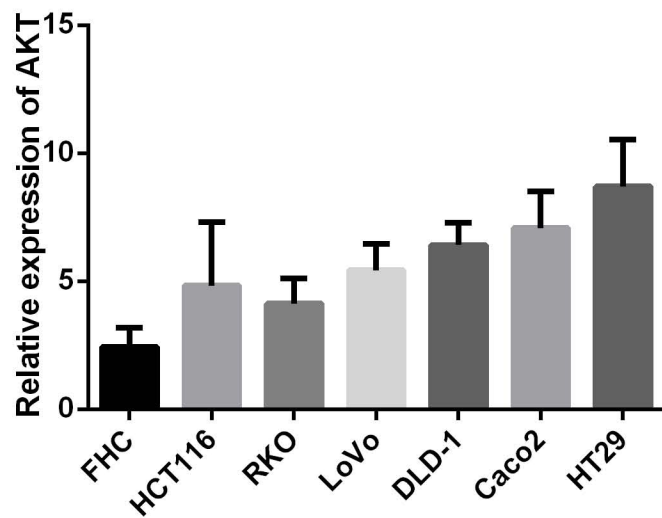**b**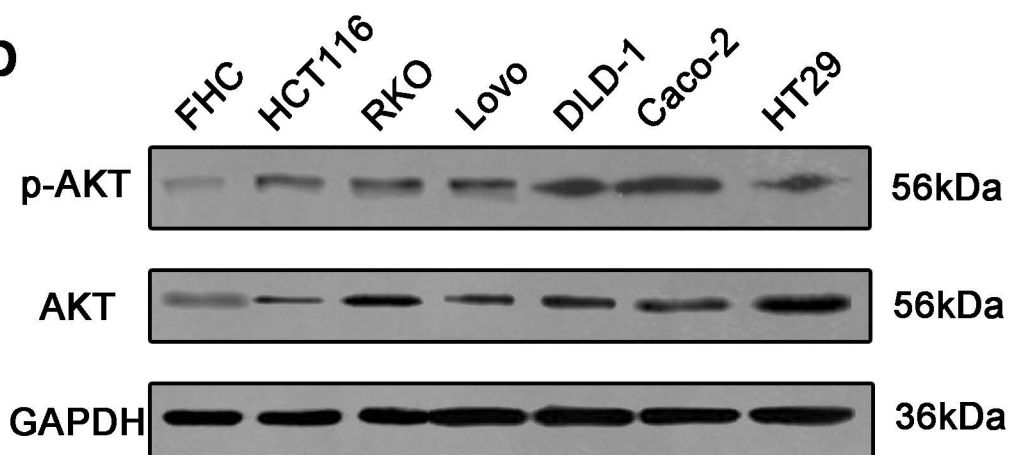**c**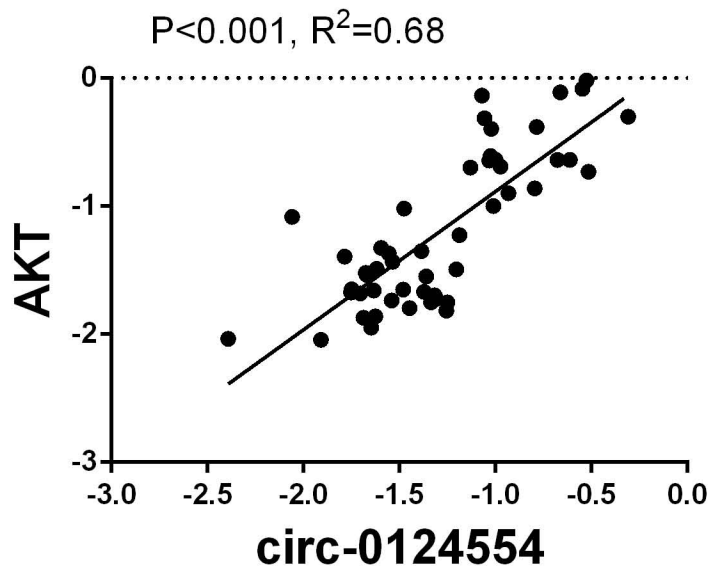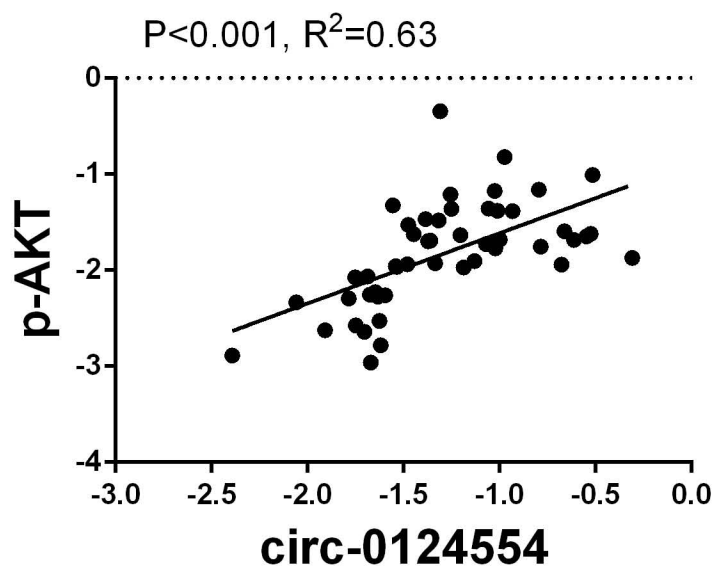

Supplement: 41419_2021_3565_MOESM1_ESM.pdf [file 41419_2021_3565_MOESM1_ESM.pdf]
